# Supplementary material for: Preparation of nanocellulose by a biological method from hemp stalk in contrast to the chemical method and its application on the electrospun composite film
Source: Royal Society of Chemistry journal article supplement (doi:10.1039/d3tb00440f), 2023-01-01
Supplement: d3tb00440f1.pdf [file d3tb00440f1.pdf]

## Supporting information

### **Preparation of nanocellulose by biological method from hemp stalk contrast chemical method and its application on the electrospun composite film**

Xin Zhang,<sup>a</sup> Jing Guo,<sup>a\*</sup> Yuanfa Liu,<sup>a\*</sup> Xinmin Hao,<sup>b</sup> Qiang Yao,<sup>a</sup> Yi Xu,<sup>a</sup> Yafei Guo,<sup>b</sup>

a. School of Textile and Material Technology, Dalian Polytechnic University, Dalian 116034, China;

b. Quartermaster Engineering Technology Institute, Academy of Military Sciences, Beijing 100082, China;

Corresponding author:

Jing Guo –*School of Textile and Material Technology, Dalian Polytechnic University, Dalian 116034, China*; Email: [guojing8161@163.com](mailto:guojing8161@163.com)

Yuanfa Liu –*School of Textile and Material Technology, Dalian Polytechnic University, Dalian 116034, China*; Email: [anrex@126.com](mailto:anrex@126.com)

Number of pages: 3

Number of tables: 1

In terms of chemical reagent dosage and reaction time, comparing CNFs and CNCs prepared by the biological and chemical from similar raw materials in Table S1. The prepared CNFs are hydrophobic by our reported new method with unique advantages on the amount of chemical reagents and reacted time. It showed that this eco-friendly preparation solves the problems of low yield, hydrophilicity and chemical strong acid pollution.

The extraction rate of the CNFs (44.7%) provided by biological in this paper is significantly higher than that CNCs (24.6%) and others (22.2%) provided by the chemical method, and is slightly higher than that CNFs (41.0%) prepared by other enzymatic methods. This is because the biological method of the invention can selectively degrade lignin and hemicellulose, and relatively completely separate cellulose, with little damage to cellulose, and thus increased their extraction rate.

Table S1 Extracted methods, and properties of CNFs and CNCs

| Method                             | Bleaching treatment                                                                                                                                                    | Preparation                                                                                                 | Propertie                        | Extractio<br>n rate | Ref.       |
|------------------------------------|------------------------------------------------------------------------------------------------------------------------------------------------------------------------|-------------------------------------------------------------------------------------------------------------|----------------------------------|---------------------|------------|
| This biological method (CNFs)      | 5% NaClO <sub>2</sub> and 0.8 % acetic acid at 80 °C for 4 h.                                                                                                          | 1.5% Pectin lyase, 1.5% chemical auxiliaries at 80 °C for 4 h.                                              | Hydrophobicity and lipophilicity | 44.7%               | This study |
| The other biological method (CNFs) | 1.3 wt% NaClO <sub>2</sub> , with mass ratio of 1:80 of sugarcane bagasse, at 65 °C for 2h; 2% KOH with the mass ratio of 1:80 of sugarcane bagasse, at 85 °C for 4 h. | 1 mg a combination of ThCel7B, TcXyn10A and TtLPMO9H enzyme with the mass ratio of 1:15, at 50 °C for 24 h. | Hydrophily and lipophilicity     | 41.0%               | [01]       |
| This chemical method (CNCs)        | 5% NaClO <sub>2</sub> and 0.8% mL acetic acid at 80 °C for 4 h.                                                                                                        | 54% H <sub>2</sub> SO <sub>4</sub> aqueous solution with mass ratio of 1:10 were boiled at 40 °C for 4 h    | Hydrophily and lipophilicity     | 24.6%               | This study |
| The other chemical method (CNCs)   | 10.8 g NaClO <sub>2</sub> , 9 mL acetic acid per g of red algae, at 75 °C for 1.5 h; 2.7 mL H <sub>2</sub> O <sub>2</sub> per g of red algae, at 80 °C for 1.5 h.      | 54% H <sub>2</sub> SO <sub>4</sub> per g of cellulose, at 30 °C for 1.5 h.                                  | Hydrophily and lipophilicity     | 22.2%               | [02]       |

01 Rossi, B.R.; Pellegrini, V.; Cortez, A. A.; Chiromito, E.; Polikarpov, I. Cellulose nanofibers production using a set of recombinant enzymes. *Carbohydr. Polym.* 2020, 256, 1175. <https://doi.org/10.1016/j.carbpol.2020.117510>.

02 Liu, Z.; Li, X.; Wei, X.; Deng, H. Extraction, isolation and characterization of nanocrystalline cellulose from industrial kelp (*laminaria japonica*) waste. *Carbohydr. Polym.*, 2017, 173, 353-359. <https://doi.org/10.1016/j.carbpol.2017.05.079>.
